# Supplementary material for: RNA triphosphatase-mediated mRNA capping is essential for maintaining transcript homeostasis and the survival of Toxoplasma gondii
Source: Research Square preprint supplement (doi:10.21203/rs.3.rs-3875304/v1), 2024-01-23
Supplement: Supplementary file 1 [file a810275204aeaa50a3b529b8.xlsx]

## Sheet: Upregulation
Table . GO terms associated with sharedgenes upregulated dataset (Cellular Components CC)
ID	Name	Bgd count	Result count	Result gene list	Pct of bgd	Fold enrichment	Odds ratio	P-value	Benjamini	Bonferroni
GO:0000139	Golgi membrane	14	3	TGME49_266310,TGME49_273370,TGME49_278890,	21.4	9	11.45	0.00395379	0.360119	0.478408
GO:0016021	integral component of membrane	1526	48	TGME49_201180,TGME49_202900,TGME49_203700,TGME49_209720,TGME49_210790,TGME49_213067,TGME49_213950,TGME49_215100,TGME49_221230,TGME49_221320,TGME49_222410,TGME49_224840,TGME49_226270,TGME49_231030,TGME49_235150,TGME49_238100,TGME49_240210,TGME49_244140,TGME49_246160,TGME49_247270,TGME49_249702,TGME49_249770,TGME49_249900,TGME49_253880,TGME49_257760,TGME49_257780,TGME49_262430,TGME49_263230,TGME49_…	3.1	1.32	1.56	0.0134624	0.360119	1
GO:0031224	intrinsic component of membrane	1528	48	TGME49_201180,TGME49_202900,TGME49_203700,TGME49_209720,TGME49_210790,TGME49_213067,TGME49_213950,TGME49_215100,TGME49_221230,TGME49_221320,TGME49_222410,TGME49_224840,TGME49_226270,TGME49_231030,TGME49_235150,TGME49_238100,TGME49_240210,TGME49_244140,TGME49_246160,TGME49_247270,TGME49_249702,TGME49_249770,TGME49_249900,TGME49_253880,TGME49_257760,TGME49_257780,TGME49_262430,TGME49_263230,TGME49_…	3.1	1.32	1.56	0.0138069	0.360119	1
GO:0012505	endomembrane system	174	9	TGME49_238100,TGME49_261980,TGME49_266310,TGME49_266940,TGME49_273370,TGME49_278890,TGME49_289350,TGME49_300060,TGME49_314875,	5.2	2.17	2.34	0.0221329	0.360119	1
GO:0005794	Golgi apparatus	68	5	TGME49_261980,TGME49_266310,TGME49_273370,TGME49_278890,TGME49_314875,	7.4	3.09	3.35	0.0222421	0.360119	1
GO:0031931	TORC1 complex	1	1	TGME49_213710,	100	42	inf	0.0238095	0.360119	1
GO:0032045	guanyl-nucleotide exchange factor complex	1	1	TGME49_314875,	100	42	inf	0.0238095	0.360119	1
GO:0034066	Ric1-Rgp1 guanyl-nucleotide exchange factor complex	1	1	TGME49_314875,	100	42	inf	0.0238095	0.360119	1
GO:0000313	organellar ribosome	2	1	TGME49_263550,	50	21	41.34	0.0470568	0.366973	1
GO:0005761	mitochondrial ribosome	2	1	TGME49_263550,	50	21	41.34	0.0470568	0.366973	1
GO:0030173	integral component of Golgi membrane	2	1	TGME49_278890,	50	21	41.34	0.0470568	0.366973	1
GO:0031228	intrinsic component of Golgi membrane	2	1	TGME49_278890,	50	21	41.34	0.0470568	0.366973	1
GO:0031932	TORC2 complex	2	1	TGME49_213710,	50	21	41.34	0.0470568	0.366973	1
GO:0038201	TOR complex	2	1	TGME49_213710,	50	21	41.34	0.0470568	0.366973	1
Table . GO terms associated with sharedgenes upregulated dataset (Biological Process BP)
ID	Name	Bgd count	Result count	Result gene list	Pct of bgd	Fold enrichment	Odds ratio	P-value	Benjamini	Bonferroni
GO:0032787	monocarboxylic acid metabolic process	48	8	TGME49_221320,TGME49_251930,TGME49_253880,TGME49_256760,TGME49_283780,TGME49_289690,TGME49_307850,TGME49_318230,	16.7	7.0	8.72	1.38594094662e-05	0.00446272984813	0.00446272984813
GO:0019184	nonribosomal peptide biosynthetic process	2	2	TGME49_226800,TGME49_232590,	100.0	42.0	inf	0.000562202681271	0.0240840252758	0.181029263369
GO:0006750	glutathione biosynthetic process	2	2	TGME49_226800,TGME49_232590,	100.0	42.0	inf	0.000562202681271	0.0240840252758	0.181029263369
GO:0006082	organic acid metabolic process	147	11	TGME49_202920,TGME49_221320,TGME49_251930,TGME49_253290,TGME49_253880,TGME49_256760,TGME49_257750,TGME49_283780,TGME49_289690,TGME49_307850,TGME49_318230,	7.5	3.14	3.55	0.000673253284647	0.0240840252758	0.216787557656
GO:0019752	carboxylic acid metabolic process	147	11	TGME49_202920,TGME49_221320,TGME49_251930,TGME49_253290,TGME49_253880,TGME49_256760,TGME49_257750,TGME49_283780,TGME49_289690,TGME49_307850,TGME49_318230,	7.5	3.14	3.55	0.000673253284647	0.0240840252758	0.216787557656
GO:0043436	oxoacid metabolic process	147	11	TGME49_202920,TGME49_221320,TGME49_251930,TGME49_253290,TGME49_253880,TGME49_256760,TGME49_257750,TGME49_283780,TGME49_289690,TGME49_307850,TGME49_318230,	7.5	3.14	3.55	0.000673253284647	0.0240840252758	0.216787557656
GO:0046031	ADP metabolic process	19	4	TGME49_256760,TGME49_283780,TGME49_289690,TGME49_318230,	21.1	8.84	11.28	0.000897541314626	0.0240840252758	0.28900830331
GO:0009135	purine nucleoside diphosphate metabolic process	19	4	TGME49_256760,TGME49_283780,TGME49_289690,TGME49_318230,	21.1	8.84	11.28	0.000897541314626	0.0240840252758	0.28900830331
GO:0006757	ATP generation from ADP	19	4	TGME49_256760,TGME49_283780,TGME49_289690,TGME49_318230,	21.1	8.84	11.28	0.000897541314626	0.0240840252758	0.28900830331
GO:0009179	purine ribonucleoside diphosphate metabolic process	19	4	TGME49_256760,TGME49_283780,TGME49_289690,TGME49_318230,	21.1	8.84	11.28	0.000897541314626	0.0240840252758	0.28900830331
GO:0009185	ribonucleoside diphosphate metabolic process	19	4	TGME49_256760,TGME49_283780,TGME49_289690,TGME49_318230,	21.1	8.84	11.28	0.000897541314626	0.0240840252758	0.28900830331
GO:0006096	glycolytic process	19	4	TGME49_256760,TGME49_283780,TGME49_289690,TGME49_318230,	21.1	8.84	11.28	0.000897541314626	0.0240840252758	0.28900830331
GO:0016052	carbohydrate catabolic process	21	4	TGME49_256760,TGME49_283780,TGME49_289690,TGME49_318230,	19.0	8.0	9.95	0.0013358299589	0.0330874805204	0.430137246765
GO:0046939	nucleotide phosphorylation	22	4	TGME49_256760,TGME49_283780,TGME49_289690,TGME49_318230,	18.2	7.64	9.4	0.00160294184971	0.0344098183738	0.516147275606
GO:0006165	nucleoside diphosphate phosphorylation	22	4	TGME49_256760,TGME49_283780,TGME49_289690,TGME49_318230,	18.2	7.64	9.4	0.00160294184971	0.0344098183738	0.516147275606
GO:0006090	pyruvate metabolic process	23	4	TGME49_256760,TGME49_283780,TGME49_289690,TGME49_318230,	17.4	7.3	8.9	0.00190508322004	0.0383397998034	0.613436796854
GO:0009132	nucleoside diphosphate metabolic process	24	4	TGME49_256760,TGME49_283780,TGME49_289690,TGME49_318230,	16.7	7.0	8.45	0.00224451605061	0.0425137746056	0.722734168296
GO:1901135	carbohydrate derivative metabolic process	127	9	TGME49_210790,TGME49_256760,TGME49_266310,TGME49_280790,TGME49_283780,TGME49_289690,TGME49_307850,TGME49_318230,TGME49_320620,	7.1	2.98	3.3	0.00304427296041	0.0503464312977	0.980255893252
GO:0006749	glutathione metabolic process	4	2	TGME49_226800,TGME49_232590,	50.0	21.0	41.69	0.00326881933396	0.0503464312977	1.0
GO:0009259	ribonucleotide metabolic process	43	5	TGME49_210790,TGME49_256760,TGME49_283780,TGME49_289690,TGME49_318230,	11.6	4.88	5.59	0.00328346291072	0.0503464312977	1.0
GO:0019693	ribose phosphate metabolic process	43	5	TGME49_210790,TGME49_256760,TGME49_283780,TGME49_289690,TGME49_318230,	11.6	4.88	5.59	0.00328346291072	0.0503464312977	1.0
GO:0044281	small molecule metabolic process	235	13	TGME49_202920,TGME49_210790,TGME49_221320,TGME49_251930,TGME49_253290,TGME49_253880,TGME49_256760,TGME49_257750,TGME49_283780,TGME49_289690,TGME49_307850,TGME49_318230,TGME49_320620,	5.5	2.32	2.57	0.00359995888918	0.052690307378	1.0
GO:0006633	fatty acid biosynthetic process	15	3	TGME49_221320,TGME49_251930,TGME49_253880,	20.0	8.4	10.49	0.00485716357627	0.0651669446483	1.0
GO:0044272	sulfur compound biosynthetic process	15	3	TGME49_226800,TGME49_232590,TGME49_257750,	20.0	8.4	10.49	0.00485716357627	0.0651669446483	1.0
GO:0072330	monocarboxylic acid biosynthetic process	17	3	TGME49_221320,TGME49_251930,TGME49_253880,	17.6	7.41	8.99	0.00701171436087	0.090310880968	1.0
GO:0046034	ATP metabolic process	33	4	TGME49_256760,TGME49_283780,TGME49_289690,TGME49_318230,	12.1	5.09	5.82	0.00733148773871	0.0907976558409	1.0
GO:0044283	small molecule biosynthetic process	74	6	TGME49_221320,TGME49_251930,TGME49_253880,TGME49_257750,TGME49_283780,TGME49_320620,	8.1	3.41	3.76	0.00795400851178	0.0932374822229	1.0
GO:0006091	generation of precursor metabolites and energy	53	5	TGME49_256760,TGME49_283780,TGME49_289690,TGME49_307850,TGME49_318230,	9.4	3.96	4.42	0.00810760714982	0.0932374822229	1.0
GO:0009259	ribonucleotide metabolic process	43	5	TGME49_210790,TGME49_256760,TGME49_283780,TGME49_289690,TGME49_318230,	11.6	4.88	5.59	0.00328346291072	0.0503464312977	1.0
GO:0019693	ribose phosphate metabolic process	43	5	TGME49_210790,TGME49_256760,TGME49_283780,TGME49_289690,TGME49_318230,	11.6	4.88	5.59	0.00328346291072	0.0503464312977	1.0
GO:0044281	small molecule metabolic process	235	13	TGME49_202920,TGME49_210790,TGME49_221320,TGME49_251930,TGME49_253290,TGME49_253880,TGME49_256760,TGME49_257750,TGME49_283780,TGME49_289690,TGME49_307850,TGME49_318230,TGME49_320620,	5.5	2.32	2.57	0.00359995888918	0.052690307378	1.0
GO:0006633	fatty acid biosynthetic process	15	3	TGME49_221320,TGME49_251930,TGME49_253880,	20.0	8.4	10.49	0.00485716357627	0.0651669446483	1.0
GO:0044272	sulfur compound biosynthetic process	15	3	TGME49_226800,TGME49_232590,TGME49_257750,	20.0	8.4	10.49	0.00485716357627	0.0651669446483	1.0
GO:0072330	monocarboxylic acid biosynthetic process	17	3	TGME49_221320,TGME49_251930,TGME49_253880,	17.6	7.41	8.99	0.00701171436087	0.090310880968	1.0
GO:0046034	ATP metabolic process	33	4	TGME49_256760,TGME49_283780,TGME49_289690,TGME49_318230,	12.1	5.09	5.82	0.00733148773871	0.0907976558409	1.0
GO:0044283	small molecule biosynthetic process	74	6	TGME49_221320,TGME49_251930,TGME49_253880,TGME49_257750,TGME49_283780,TGME49_320620,	8.1	3.41	3.76	0.00795400851178	0.0932374822229	1.0
GO:0006091	generation of precursor metabolites and energy	53	5	TGME49_256760,TGME49_283780,TGME49_289690,TGME49_307850,TGME49_318230,	9.4	3.96	4.42	0.00810760714982	0.0932374822229	1.0

## Sheet: Downregulation
Table . GO terms associated with sharedgenes downregulated dataset (Cellular component CC)
ID	Name	Bgd count	Result count	Result gene list	Pct of bgd	Fold enrichment	Odds ratio	P-value	Benjamini	Bonferroni
GO:0000786	nucleosome	11	6	TGME49_239260,TGME49_251870,TGME49_261240,TGME49_261250,TGME49_261580,TGME49_305160,	54.5	25.99	59.35	3.1365e-08	1.08209e-06	2.16418e-06
GO:0032993	protein-DNA complex	11	6	TGME49_239260,TGME49_251870,TGME49_261240,TGME49_261250,TGME49_261580,TGME49_305160,	54.5	25.99	59.35	3.1365e-08	1.08209e-06	2.16418e-06
GO:0044815	DNA packaging complex	13	6	TGME49_239260,TGME49_251870,TGME49_261240,TGME49_261250,TGME49_261580,TGME49_305160,	46.2	21.99	42.38	1.12582e-07	2.58939e-06	7.76816e-06
GO:0000785	chromatin	19	6	TGME49_239260,TGME49_251870,TGME49_261240,TGME49_261250,TGME49_261580,TGME49_305160,	31.6	15.05	22.79	1.60663e-06	2.77144e-05	0.000110858
GO:0045177	apical part of cell	130	12	TGME49_204050,TGME49_204130,TGME49_208030,TGME49_211290,TGME49_218520,TGME49_247520,TGME49_250710,TGME49_261740,TGME49_270250,TGME49_286450,TGME49_309590,TGME49_319560,	9.2	4.4	5.23	1.41333e-05	0.00019504	0.000975199
GO:0020039	pellicle	85	9	TGME49_212770,TGME49_219170,TGME49_233030,TGME49_240630,TGME49_246490,TGME49_264990,TGME49_271930,TGME49_286580,TGME49_315750,	10.6	5.05	5.95	6.09608e-05	0.000600899	0.00420629
GO:0070258	inner membrane pellicle complex	85	9	TGME49_212770,TGME49_219170,TGME49_233030,TGME49_240630,TGME49_246490,TGME49_264990,TGME49_271930,TGME49_286580,TGME49_315750,	10.6	5.05	5.95	6.09608e-05	0.000600899	0.00420629
Table . GO terms associated with sharedgenes downregulated dataset (Biological Process BP)
ID	Name	Bgd count	Result count	Result gene list	Pct of bgd	Fold enrichment	Odds ratio	P-value	Benjamini	Bonferroni
GO:0008653	lipopolysaccharide metabolic process	9	3	TGME49_218720,TGME49_240630,TGME49_262050,	33.3	18.26	27.8	0.000456306888016	0.0415239268095	0.083047853619
GO:0009103	lipopolysaccharide biosynthetic process	9	3	TGME49_218720,TGME49_240630,TGME49_262050,	33.3	18.26	27.8	0.000456306888016	0.0415239268095	0.083047853619
GO:0044262	cellular carbohydrate metabolic process	28	4	TGME49_218720,TGME49_240630,TGME49_262050,TGME49_263130,	14.3	7.82	9.34	0.0015197401544	0.0720957692032	0.2765927081
GO:0000271	polysaccharide biosynthetic process	16	3	TGME49_218720,TGME49_240630,TGME49_262050,	18.8	10.27	12.81	0.00277291420012	0.0720957692032	0.504670384423
GO:0044264	cellular polysaccharide metabolic process	16	3	TGME49_218720,TGME49_240630,TGME49_262050,	18.8	10.27	12.81	0.00277291420012	0.0720957692032	0.504670384423
GO:0005976	polysaccharide metabolic process	16	3	TGME49_218720,TGME49_240630,TGME49_262050,	18.8	10.27	12.81	0.00277291420012	0.0720957692032	0.504670384423
GO:0033692	cellular polysaccharide biosynthetic process	16	3	TGME49_218720,TGME49_240630,TGME49_262050,	18.8	10.27	12.81	0.00277291420012	0.0720957692032	0.504670384423
GO:0034637	cellular carbohydrate biosynthetic process	18	3	TGME49_218720,TGME49_240630,TGME49_262050,	16.7	9.13	11.1	0.00393536015815	0.089529443598	0.716235548784
GO:0001932	regulation of protein phosphorylation	8	2	TGME49_242070,TGME49_266900,	25.0	13.69	18.32	0.00859148638592	0.160103510424	1.0
GO:0016051	carbohydrate biosynthetic process	25	3	TGME49_218720,TGME49_240630,TGME49_262050,	12.0	6.57	7.56	0.0101175706705	0.160103510424	1.0
GO:0042325	regulation of phosphorylation	9	2	TGME49_242070,TGME49_266900,	22.2	12.17	15.7	0.0109158233854	0.160103510424	1.0
GO:1903509	liposaccharide metabolic process	26	3	TGME49_218720,TGME49_240630,TGME49_262050,	11.5	6.32	7.23	0.0112884331954	0.160103510424	1.0
GO:0006468	protein phosphorylation	169	8	TGME49_203010,TGME49_218720,TGME49_240090,TGME49_240630,TGME49_242230,TGME49_242240,TGME49_262050,TGME49_291050,	4.7	2.59	2.84	0.0114359650303	0.160103510424	1.0
GO:0006425	glutaminyl-tRNA aminoacylation	1	1	TGME49_217460,	100.0	54.77	inf	0.0182572614107	0.228083938481	1.0
GO:0031399	regulation of protein modification process	12	2	TGME49_242070,TGME49_266900,	16.7	9.13	10.98	0.0193140100735	0.228083938481	1.0
GO:0005975	carbohydrate metabolic process	88	5	TGME49_218720,TGME49_240630,TGME49_262050,TGME49_263130,TGME49_307570,	5.7	3.11	3.37	0.0216483897053	0.228083938481	1.0
GO:0019220	regulation of phosphate metabolic process	13	2	TGME49_242070,TGME49_266900,	15.4	8.43	9.98	0.0225577521575	0.228083938481	1.0
GO:0051174	regulation of phosphorus metabolic process	13	2	TGME49_242070,TGME49_266900,	15.4	8.43	9.98	0.0225577521575	0.228083938481	1.0
GO:0016310	phosphorylation	196	8	TGME49_203010,TGME49_218720,TGME49_240090,TGME49_240630,TGME49_242230,TGME49_242240,TGME49_262050,TGME49_291050,	4.1	2.24	2.42	0.0257488735061	0.246647104111	1.0
GO:0032200	telomere organization	2	1	TGME49_248160,	50.0	27.39	54.38	0.0361849146574	0.281209096183	1.0
GO:0006303	double-strand break repair via nonhomologous end joining	2	1	TGME49_248160,	50.0	27.39	54.38	0.0361849146574	0.281209096183	1.0
GO:0000723	telomere maintenance	2	1	TGME49_248160,	50.0	27.39	54.38	0.0361849146574	0.281209096183	1.0
GO:0046168	glycerol-3-phosphate catabolic process	2	1	TGME49_307570,	50.0	27.39	54.38	0.0361849146574	0.281209096183	1.0
