# Supplementary material for: RNA triphosphatase-mediated mRNA capping is essential for maintaining transcript homeostasis and the survival of Toxoplasma gondii
Source: Research Square preprint supplement (doi:10.21203/rs.3.rs-3875304/v1), 2024-01-23
Supplement: Supplementary file 2 [file b412954f1f7cd90726dc435a.docx]

The Cap sequencing (RNA-Seq) data for the TgRTmAID-3HA transgenic parasite line upon 8h of treatment with vehicle or IAA has been deposited in NCBI’s SRA data with accession numbers **SRR27549198**(control) and **SRR27560546**(Treatment).

To assist the reviewers to fully assess the RNA-sequencing data in our manuscript, we have generated the following reviewer link.

BioProject and associated SRA metadata are available at [https://dataview.ncbi.nlm.nih.gov/object/PRJNA1064470?reviewer=d7lj0lvgmfj9q7f586spt4g4or](https://urldefense.com/v3/__https:/dataview.ncbi.nlm.nih.gov/object/PRJNA1064470?reviewer=d7lj0lvgmfj9q7f586spt4g4or__;!!NLFGqXoFfo8MMQ!vZ9nhocrcNvpXzr7f4KQ0mNrBFdcrgJJHIf324g43Rt90m4jIyhVwdOhzRNqz00AMCoQrIK0lAAVtzmPyJE9$)

in read-only format.
